# Supplementary material for: Telehealth Availability for Mental Health Care During and After the COVID-19 Public Health Emergency
Source: PubMed Central journal article supplement (PMC11238022; doi:10.1001/jamanetworkopen.2024.20853), 2024-07-10
Supplement: jamanetwopen-e2420853-s002.pdf [file jamanetwopen-e2420853-s002.pdf]

## Data Sharing Statement

McBain. Telehealth Availability for Mental Health Care During and After the COVID-19 Public Health Emergency. *JAMA Netw Open*. Published July 10, 2024.

doi:10.1001/jamanetworkopen.2024.20853

### Data

**Data available:** Yes

**Data types:** Deidentified participant data

**How to access data:** Data provided by study lead author, upon request

**When available:** With publication

### Supporting Documents

**Document types:** Statistical/analytic code

**How to access documents:** Data provided by study lead author, upon request

**When available:** With publication

### Additional Information

**Who can access the data:** Researchers who proposed use of the data has been approved

**Types of analyses:** For research purposes

**Mechanisms of data availability:** After approval of proposal

**Any additional restrictions:** NA
